# Supplementary material for: A new ditopic ratiometric receptor for detecting zinc and fluoride ions in living cells
Source: Royal Society of Chemistry journal article supplement (doi:10.1039/c3an00351e), 2013-01-01
Supplement: c3an00351e.pdf [file c3an00351e.pdf]

## Electronic Supporting Information (ESI)

### **A new ditopic ratiometric receptor for detecting zinc and fluoride ions in living cells**

**Ya-Ping Li,<sup>a</sup> Qiang Zhao,<sup>a</sup> Hua-Rong Yang,<sup>a</sup> Sui-Jun Liu,<sup>a</sup> Xiu-Ming Liu,<sup>a</sup> Ying-Hui  
Zhang,<sup>a</sup> Tong-Liang Hu,<sup>a</sup> Jia-Tong Chen,<sup>b</sup> Ze Chang,<sup>a,\*</sup> and Xian-He Bu<sup>a</sup>**

a) Department of Chemistry, TKL of Metal and Molecule-based Material Chemistry;  
Synergetic Innovation Center of Chemical Science and Engineering (Tianjin), Nankai  
University, Tianjin 300071, China.

Corresponding author E-mail: [buxh@nankai.edu.cn](mailto:buxh@nankai.edu.cn), [change@nankai.edu.cn](mailto:change@nankai.edu.cn)

b) Department of Biochemistry and Molecular Biology, and College of Life Sciences,  
Nankai University, Tianjin 300071 (China)

## The comparison between ESIPT and PET mechanisms

### (i) PET mechanism

Upon excitation of the fluorophore, an electron of the highest occupied molecular orbital (HOMO) is promoted to the lowest unoccupied molecular orbital (LUMO), which enables PET (between the frontier orbitals between cations receptor and fluorophore), and causes fluorescence quenching of the latter (See Scheme S1).

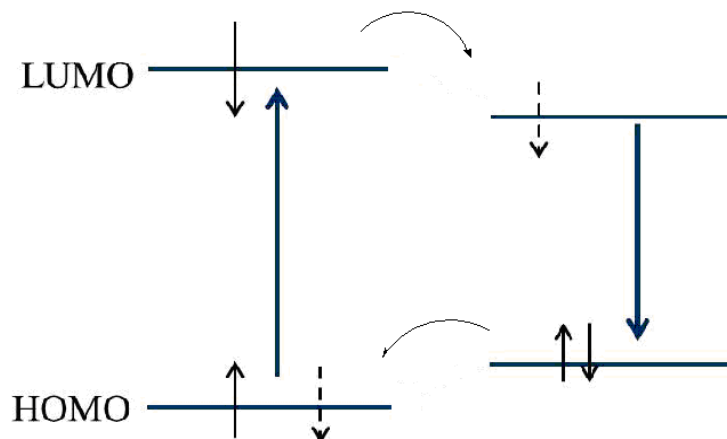

**Scheme S1.** Principle of cation recognition by fluorescent PET sensor.

### (ii) ESIPT mechanism

For example, benzimidazole derivatives ( $T_A$ ) containing an intramolecular hydrogen bond undergo ESIPT (Scheme S2). The coordination of OH-moieties with  $Zn^{2+}$  will remove this proton and disrupt the ESIPT process.

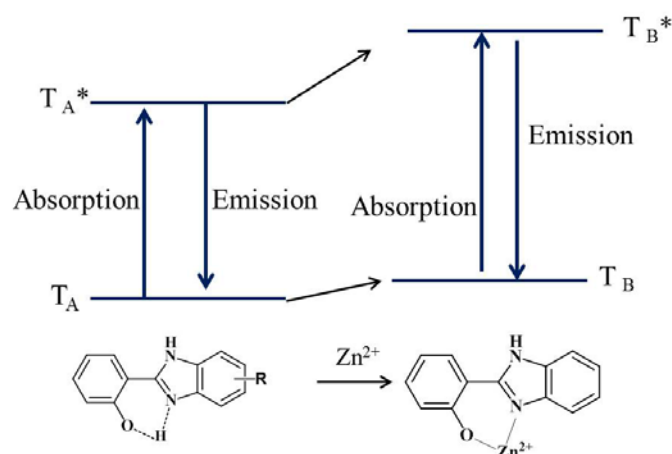

**Scheme S2.** Simplified Jablonski diagram illustrating the increase of the emission energy upon metal-cation-induced inhibition of ESIPT.

### Synthesis of compounds **2** and **3**

The dibenzo-18-crown-6 compounds (**2** and **3**) were synthesized according to the literature method.<sup>S1</sup> To a stirring solution of dibenzo-18-crown-6 (6 mmol) in dichloromethane, concentrated nitric acid (15 mL) was added dropwise, and, after 5-10 min, concentrated sulfuric acid (7.5 mL) was added in the same manner. The mixture was stirred at room temperature for 48-72 h. The product (**2**), precipitated out of the solution as a fine yellow powder (yield ~80%), was obtained by filtration, washed with water, and dried in the oven (80 °C) .

2,3,13,14-Tetranitro-6,7,9,10,17,18,20,21-octahydrodibenzo[b,k][1,4,7,10,13,16]hexaoxa cyclooctadecine (**2**, 0.50 g) was added to the suspension of Pd/C (0.25 g) in degassed ethanol (50 mL) and hydrazine hydrate (15 mL), and the resultant mixture was refluxed with stirring for about 4 hours under argon atmosphere. After cooling (反应是否加热? 多少度? ) , the reaction mixture was filtered to afford compound **3** as white needle-like solids (yield ~20%).

### Reference

S1. S. A. Duggan, G. Fallon, S. J. Langford, V. L. Laau, J. F. Satchell, M. N. Paddon-Row, *J. Org. Chem.* **2001**, 66, 4419.

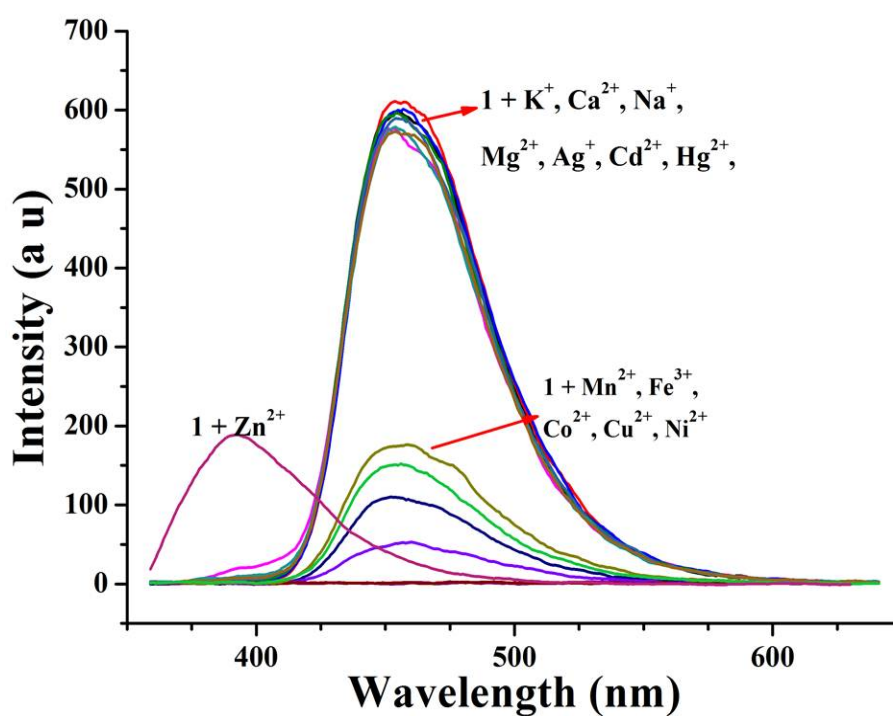

a)

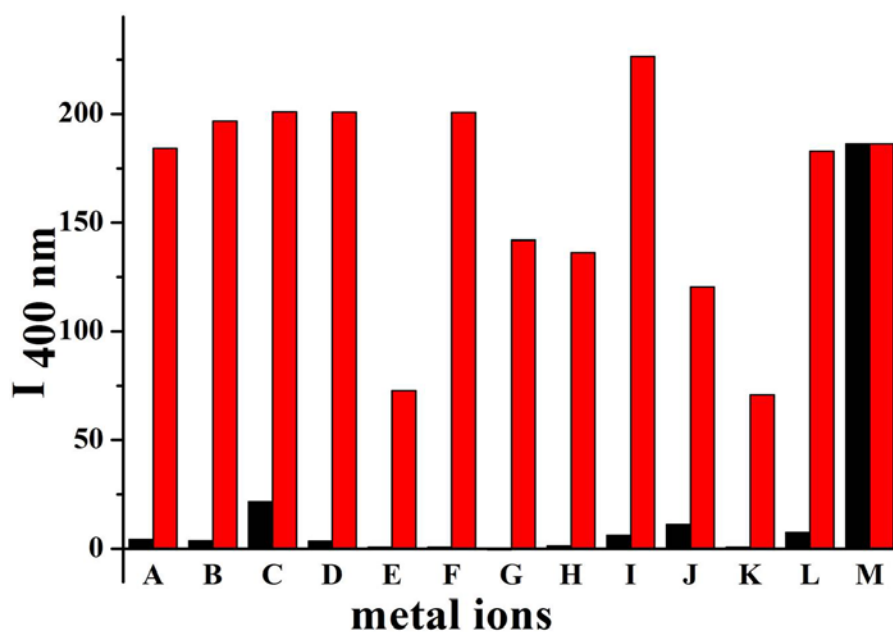

b)

**Figure S1.** Changes in a) fluorescence spectra of **1** ( $1.0 \times 10^{-6}$  M) upon the addition of different cations in CH<sub>3</sub>CN solution; b) fluorescence intensity at 400 nm of **1** in the presence of other metal ions in CH<sub>3</sub>CN ( $\lambda_{\text{ex}} = 330$  nm); black bars, **1** + competing ions, red bars, **1** + competing ions + Zn<sup>2+</sup>, (A) K<sup>+</sup>, (B) Na<sup>+</sup>, (C) Mg<sup>2+</sup>, (D) Ca<sup>2+</sup>, (E) Mn<sup>2+</sup>, (F) Co<sup>2+</sup>, (G) Cu<sup>2+</sup>, (H) Ni<sup>2+</sup>, (I) Cd<sup>2+</sup>, (J) Hg<sup>2+</sup>, (K) Fe<sup>3+</sup>, (L) Ag<sup>+</sup>, (M) Zn<sup>2+</sup>.

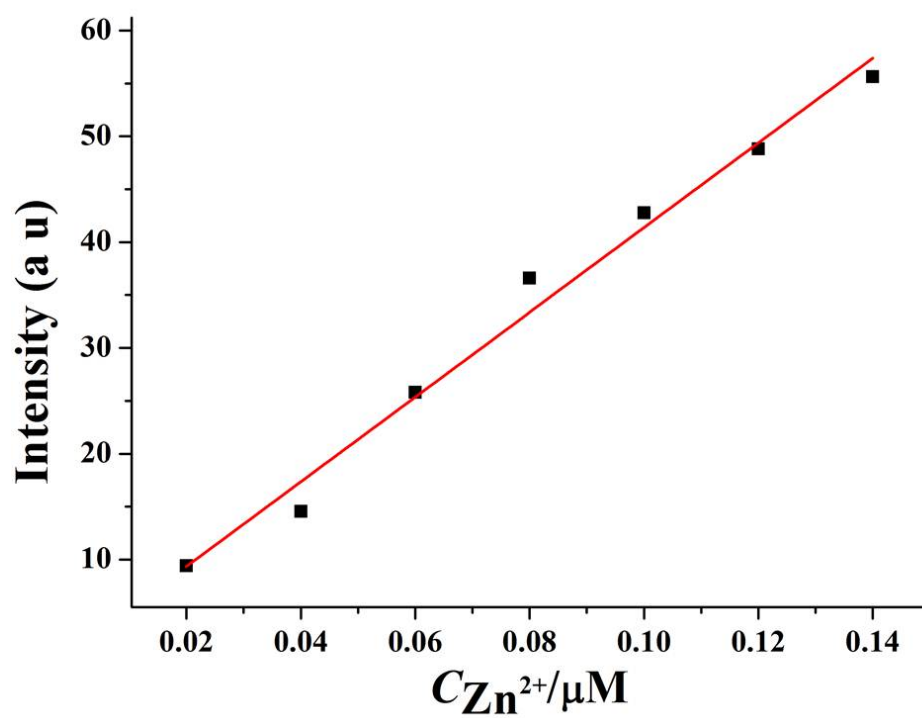

**Figure S2.** Fluorescence titration of **1** ( $1.0 \times 10^{-6}$  M) with  $\text{Zn}(\text{NO}_3)_2$  in  $\text{CH}_3\text{CN}$ .  $[\text{Zn}^{2+}]$ : 0.02, 0.04, 0.06, 0.08, 0.10, 0.12, 0.14  $\times 10^{-6}$  M.

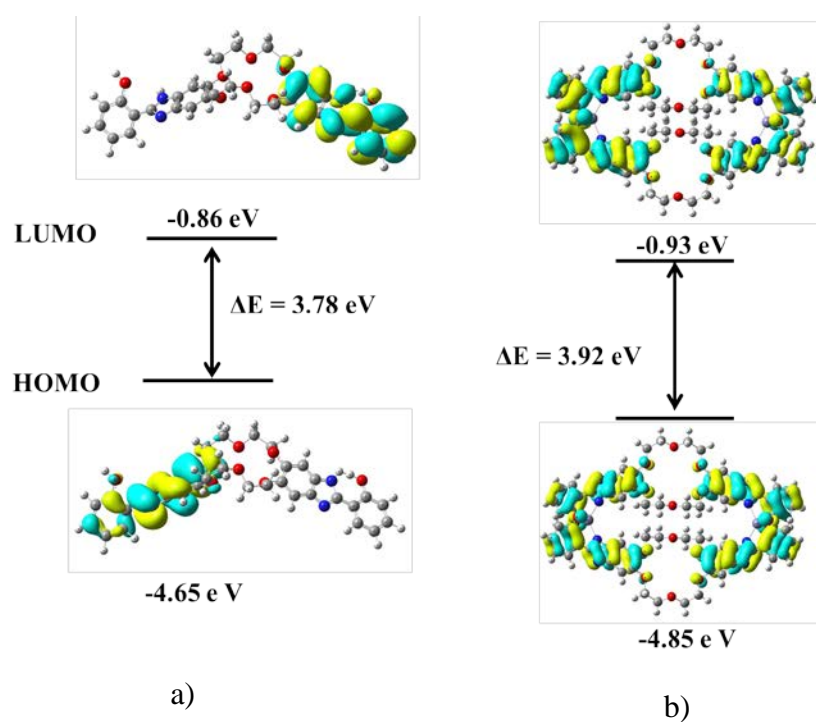

**Figure S3.** The HOMO–LUMO energy gaps and interfacial plots of the orbitals for: a) free **1**, b) **1**-Zn<sup>2+</sup> complex, gray, red and blue atoms of the molecular frameworks indicate the C, O, N, and metal atoms, respectively. Gray and cyan deep parts on the interfacial plots refer to the different phases of the molecular wave functions, for which the iso value is 0.02 a.u..

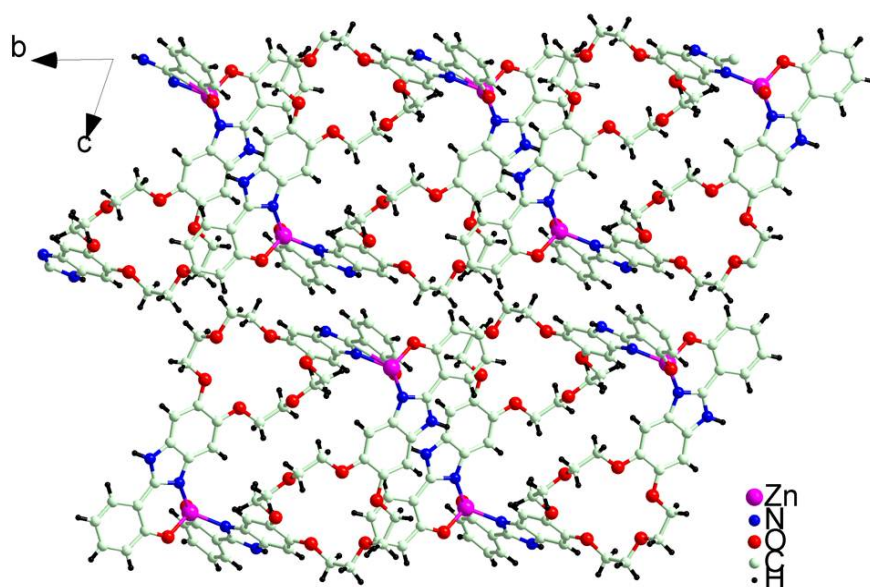

**Figure S4.** View of the packing diagram of **1**-Zn<sup>2+</sup> along *a* direction.

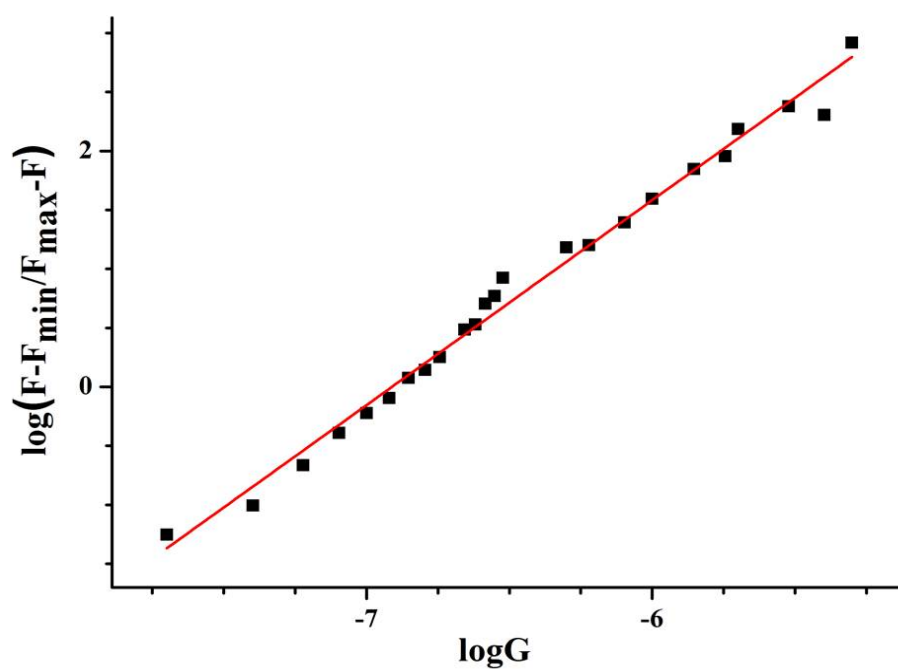

**Figure S5.** The plot of fluorescence intensity at 400 nm of **1** ( $1.0 \times 10^{-6}$  M) *versus* increasing concentration of  $\text{Zn}^{2+}$  in  $\text{CH}_3\text{CN}$  solution. The excitation and emission slit widths were 2.5 and 5 nm, respectively ( $\lambda_{\text{ex}} = 330$  nm).



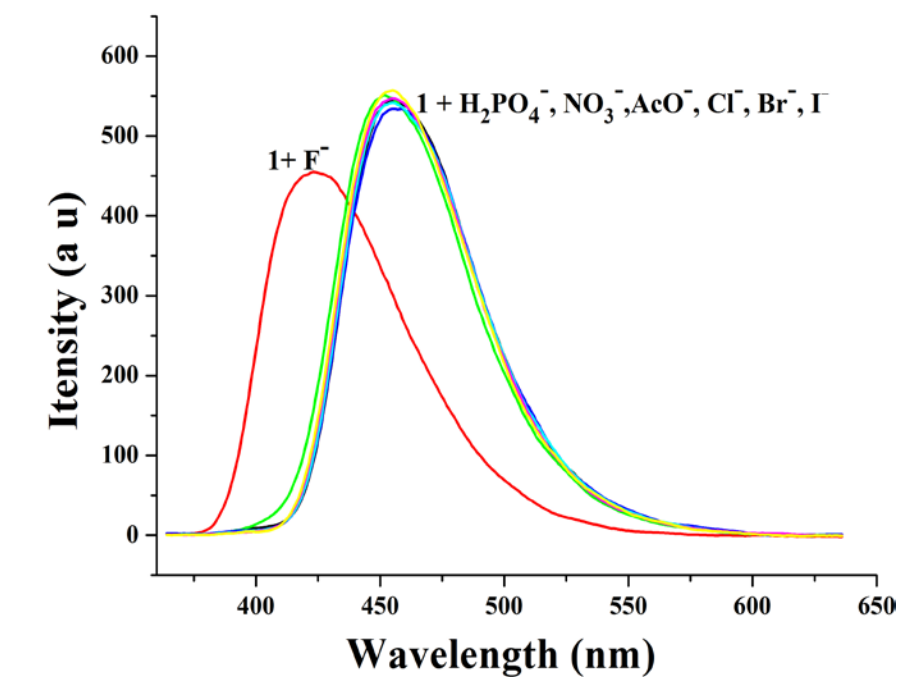

a)

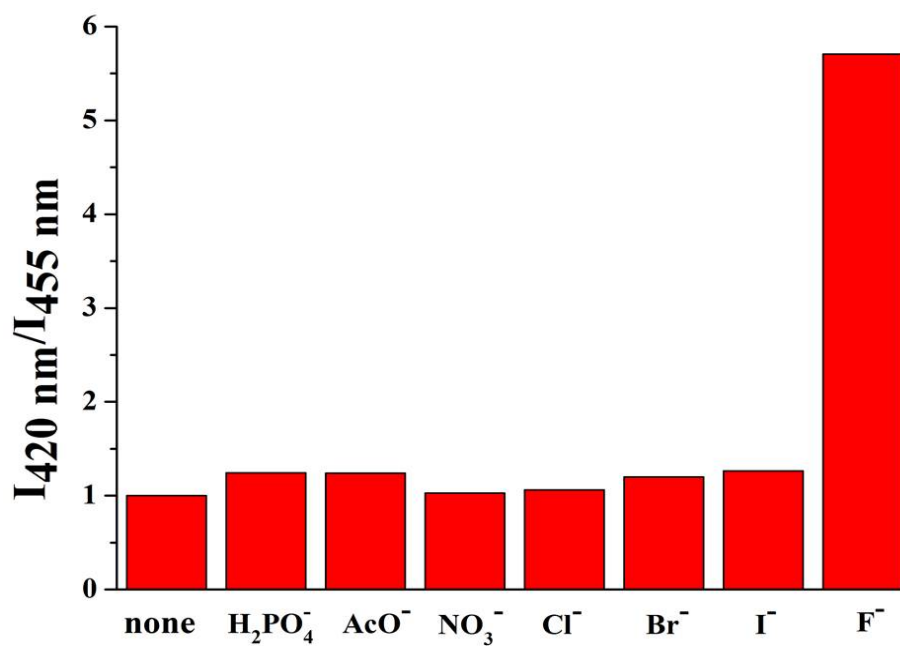

b)

**Figure S6.** Fluorescent spectral changes of **1** ( $1.0 \times 10^{-6}$  M): a) upon addition of different anions (as *n*-Bu<sub>4</sub>N<sup>+</sup> salts) in CH<sub>3</sub>CN; b) the intensity changes of **1** upon addition of different anions.

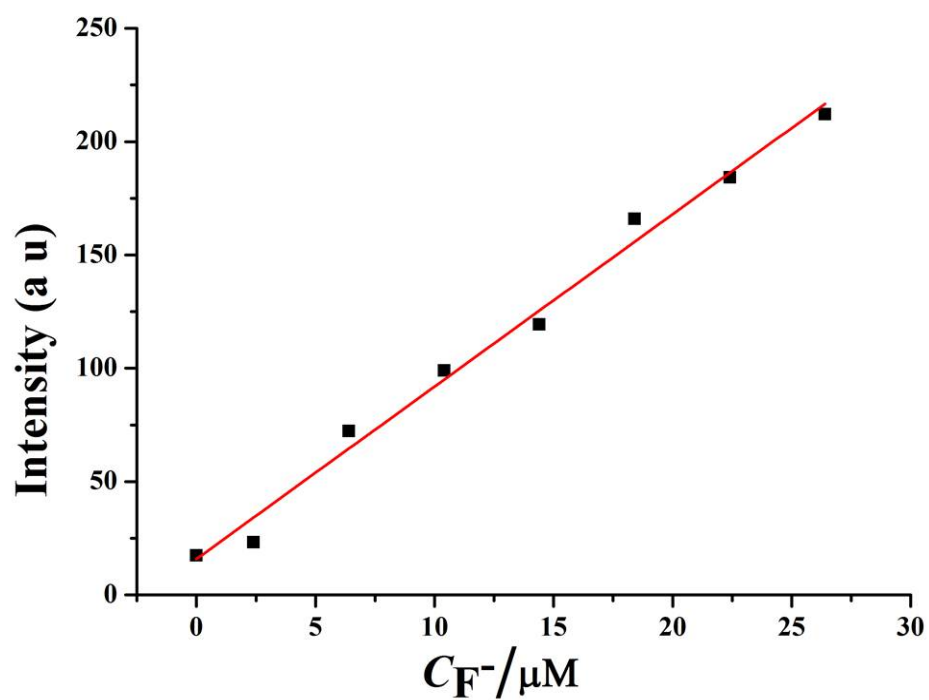

**Figure S7.** Fluorescence titration of **1** ( $1.0 \times 10^{-6}$  M) with TABF in  $\text{CH}_3\text{CN}$ .  $[\text{F}^-]$ : 0, 2.5, 5, 10, 15, 20, 25,  $30 \times 10^{-6}$  M.

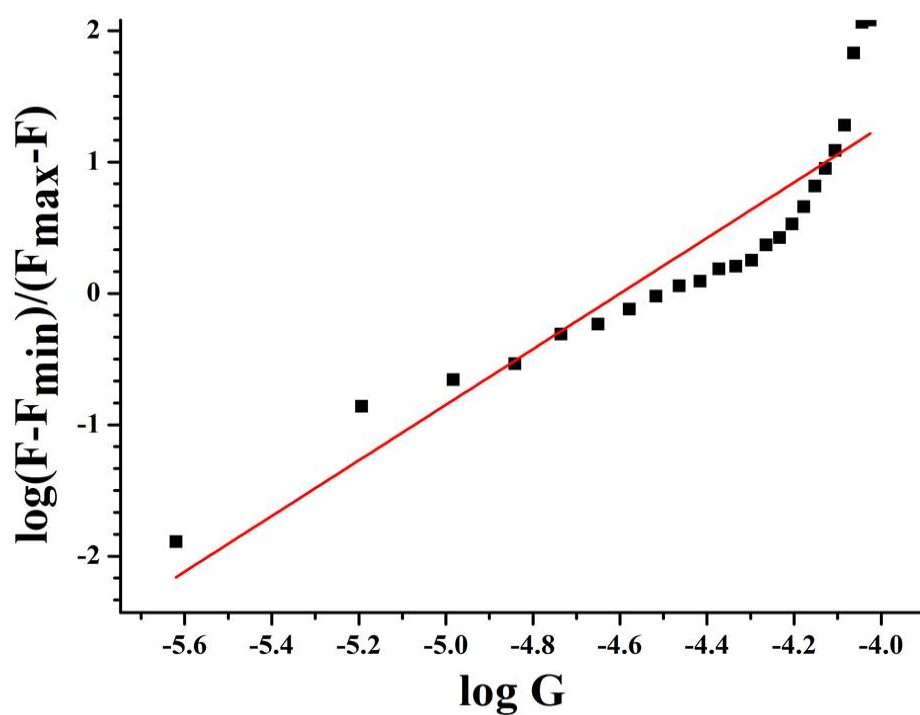

**Figure S8.** The plot of fluorescence intensity at 420 nm of **1** ( $1.0 \times 10^{-6}$  M) *versus* increasing concentration of  $F^-$  in  $CH_3CN$  solution. The excitation and emission slit widths were 2.5 and 5 nm, respectively ( $\lambda_{ex} = 330$  nm).

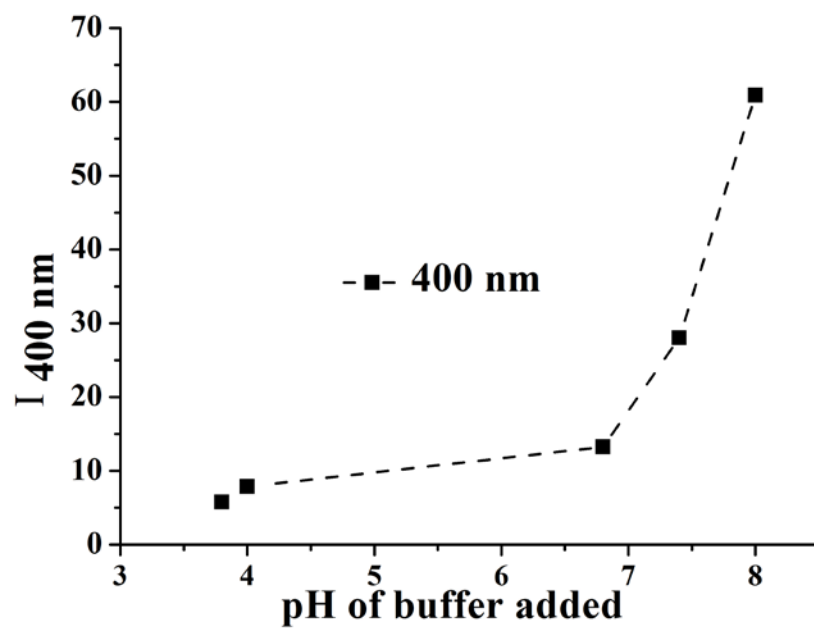

a)

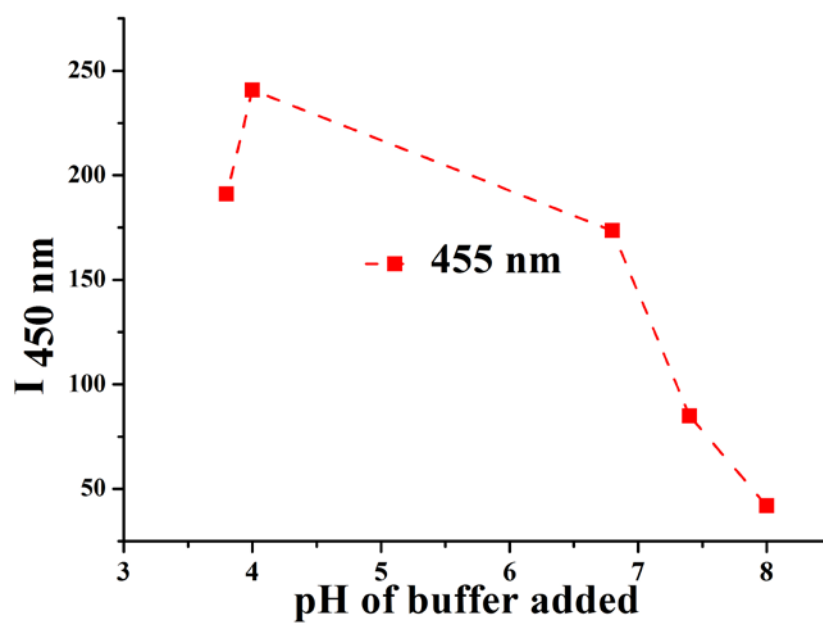

b)

**Figure S9.** Influence of medium acidity on the fluorescence intensity of **1** ( $5 \times 10^{-5}$  M), measured in 90/10 (v/v) acetonitrile-citrate buffer (0.1 M SSC, pH = 3.8, 4.0, 6.8, 7.2, 8.0, before mixing with  $\text{CH}_3\text{CN}$ ) mixed solution,  $\lambda_{\text{ex}} = 330$  nm. a)  $\lambda_{\text{em}} = 400$  nm; b)  $\lambda_{\text{em}} = 455$  nm.

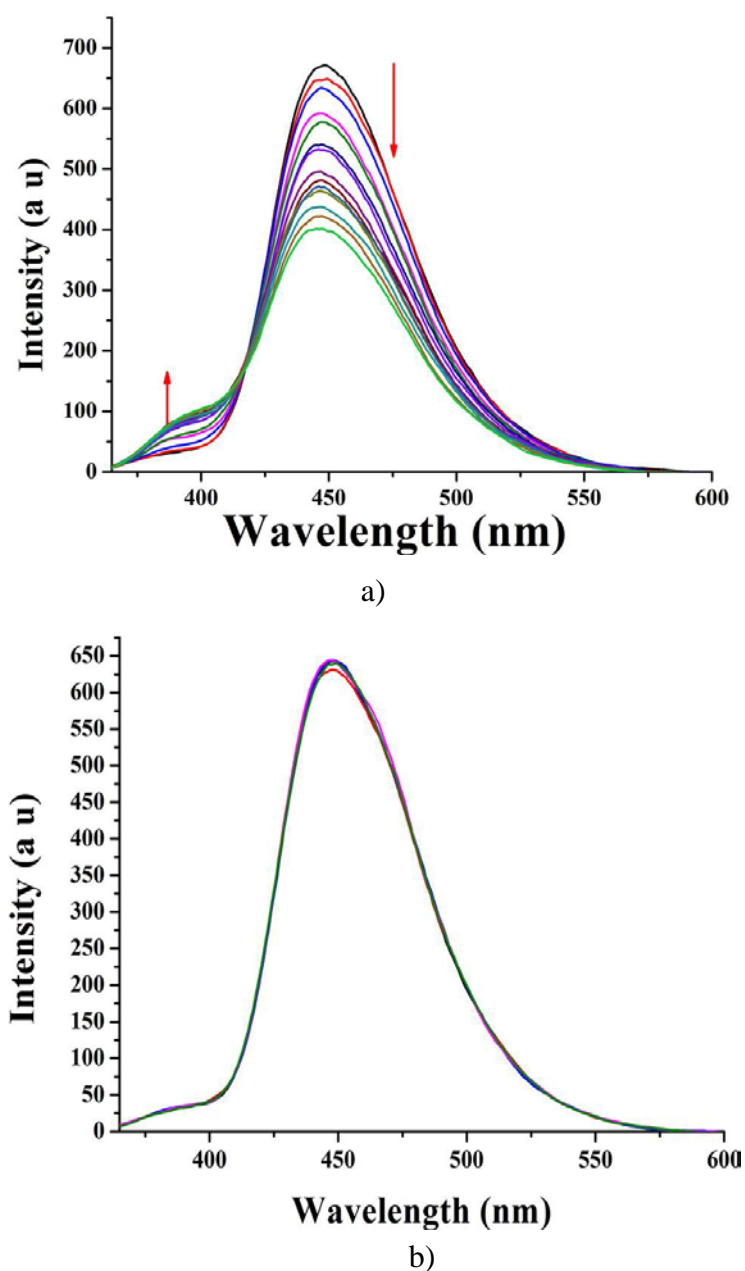

**Figure S10.** a) Fluorescence titration of **1** ( $5 \times 10^{-5}$  M) with addition of  $\text{Zn}^{2+}$  (from 0 to 50 equiv.  $\text{Zn}^{2+}$ ) in buffer solution ( $\text{CH}_3\text{CN}/0.1$  M SSC (pH 4.0, before mixing with  $\text{CH}_3\text{CN}$ ) = 90/10, v/v); b) fluorescence ( $\lambda_{\text{ex}} = 330$  nm) titration of **1** ( $5 \times 10^{-5}$  M) with addition of  $\text{F}^-$  (as  $n\text{-Bu}_4\text{N}^+$  salts, from 0 to 300 equiv.  $\text{F}^-$ ) in buffer solution ( $\text{CH}_3\text{CN}/0.1$  M SSC (pH 4.0, before mixing with  $\text{CH}_3\text{CN}$ ) = 90/10, v/v), ( $\lambda_{\text{ex}} = 330$  nm).

**Table S1.** Crystal data and structure refinement parameters of **1-Zn<sup>2+</sup>**.

|                                                                                                       | <b>1-Zn<sup>2+</sup></b>                                                       |
|-------------------------------------------------------------------------------------------------------|--------------------------------------------------------------------------------|
| Chemical formula                                                                                      | C <sub>68</sub> H <sub>88</sub> Zn <sub>2</sub> N <sub>8</sub> O <sub>30</sub> |
| Formula weight                                                                                        | 1628.24                                                                        |
| Crystal system                                                                                        | Triclinic                                                                      |
| Space group                                                                                           | <i>P</i> -1                                                                    |
| <i>a</i> /Å                                                                                           | 9.6798(19)                                                                     |
| <i>b</i> /Å                                                                                           | 14.736(3)                                                                      |
| <i>c</i> /Å                                                                                           | 15.034(3)                                                                      |
| $\alpha$ /°                                                                                           | 69.35(3)                                                                       |
| $\beta$ /°                                                                                            | 85.90(3)                                                                       |
| $\gamma$ /°                                                                                           | 77.39(3)                                                                       |
| <i>V</i> /Å <sup>3</sup>                                                                              | 1958.3(7)                                                                      |
| <i>D</i> <sub>calcd</sub> /g cm <sup>-3</sup>                                                         | 1.381                                                                          |
| <i>Z</i>                                                                                              | 1                                                                              |
| <i>T</i>                                                                                              | 293(2)                                                                         |
| $\mu$ /mm <sup>-1</sup>                                                                               | 0.699                                                                          |
| <i>R</i> ( <i>int</i> )                                                                               | 0.1197                                                                         |
| <i>R</i> <sub>I</sub> <sup>a</sup> / <i>wR</i> <sub>2</sub> <sup>b</sup> [ <i>I</i> > 2σ( <i>I</i> )] | 0.1089/0.2276                                                                  |
| GOF on <i>F</i> <sup>2</sup>                                                                          | 1.090                                                                          |

<sup>a</sup>  $R = \Sigma(|F_0| - |F_C|)/\Sigma|F_0|$ . <sup>b</sup>  $Rw = [\Sigma w(|F_0|^2 - |F_C|^2)^2/(\Sigma w|F_0|^2)^2]^{1/2}$ .

**Table S2.** Selected bond lengths (Å) and angles (°) for **1-Zn<sup>a</sup>**

|                                       |           |                          |           |
|---------------------------------------|-----------|--------------------------|-----------|
| Zn1—N3                                | 1.971 (6) | Zn1—O7                   | 1.973 (6) |
| Zn1—N1 <sup>#1</sup>                  | 1.967(6)  | Zn1—O8 <sup>#1</sup>     | 1.964 (6) |
| N3—Zn1—O8 <sup>#1</sup>               | 111.3 (3) | N3—Zn1—O7                | 92.2 (3)  |
| N3—Zn1—N1 <sup>#1</sup>               | 127.7 (3) | O8 <sup>#1</sup> —Zn1—O7 | 119.1 (3) |
| O8 <sup>i</sup> —Zn1—N1 <sup>#1</sup> | 93.8 (3)  | N1 <sup>#1</sup> —Zn1—O7 | 115.1 (3) |

<sup>a</sup>Symmetry code: #1: -x+2, -y+1, -z.
